# Supplementary material for: Rational design of aggregation-induced emission sensor based on Rhodamine B for turn-on sensing of trivalent metal cations, reversible data protection, and bioimaging
Source: Royal Society of Chemistry journal article supplement (doi:10.1039/c8qm00424b), 2018-11-19
Supplement: c8qm00424b1.pdf [file c8qm00424b1.pdf]

## Supporting Information

### **Rational design of aggregation-induced emission sensor based on Rhodamine B for turn-on sensing trivalent metal cations, reversible data protection, and bioimaging**

Hai-Xia Yu, Junge Zhi\*, Zheng-Feng Chang, Tianjiao Shen, Weilu Ding, Xiaoling Zhang, and Jin-Liang Wang\*

Key Laboratory of Cluster Science of Ministry of Education, Beijing Key Laboratory of Photoelectronic/Electrophotonic Conversion Materials, School of Chemistry and Chemical Engineering, Beijing Institute of Technology, Beijing, 100081, P. R. China.

E-mail: jinlwang@bit.edu.cn; jungezhi@bit.edu.cn

## Contents

**Fig. S1**  $^1\text{H}$  NMR spectrum (in  $\text{CDCl}_3$ ) of **TPETHRB**.

**Fig. S2**  $^{13}\text{C}$  NMR spectrum (in  $\text{CDCl}_3$ ) of **TPETHRB**.

**Fig. S3** Mass spectrum (ESI) of **TPETHRB**.

**Fig. S4** Absorption spectra of **TPETHRB** (10  $\mu\text{M}$ ) in  $\text{CH}_3\text{CN-H}_2\text{O}$  mixtures ( $f_w = 0-99\%$ ).

**Fig. S5** Particle size distributions of **TPETHRB** in  $\text{CH}_3\text{CN-H}_2\text{O}$  mixtures with different water contents, (a)  $f_w = 60\%$ , (b)  $f_w = 70\%$ , (c)  $f_w = 80\%$  and (d)  $f_w = 90\%$ .

**Fig. S6** The 2D stacking modes of **TPETHRB** along (a) a axis, (b) b axis and (c) 3D stacking mode.

**Fig. S7** Response time of **TPETHRB** (10  $\mu\text{M}$ ) in  $\text{CH}_3\text{CN-H}_2\text{O}$  (v:v 3:2) mixtures with  $\text{Fe}^{3+}$  (50  $\mu\text{M}$ ),  $\text{Al}^{3+}$  (150  $\mu\text{M}$ ),  $\text{Cr}^{3+}$  (150  $\mu\text{M}$ ),  $\text{H}^+$  (150  $\mu\text{M}$ ).

**Fig. S8** Fluorescence titration plots of compound **TPETHRB** (10  $\mu\text{M}$ ) in  $\text{CH}_3\text{CN-H}_2\text{O}$  solution with different species (a)  $\text{Fe}^{3+}$ , (b)  $\text{Al}^{3+}$ , (c)  $\text{Cr}^{3+}$ , (d)  $\text{H}^+$ .

**Fig. S9** The plots of  $[\text{I}'/\text{I}_0'-1]$  versus the concentration of trivalent metal cations and  $\text{H}^+$ , (a)  $\text{Fe}^{3+}$ , (b)  $\text{Al}^{3+}$ , (c)  $\text{Cr}^{3+}$ , (d)  $\text{H}^+$ .

**Fig. S10** UV-vis absorption spectra of **TPETHRB** with monovalent and divalent metal ions.

**Fig. S11** Fluorescence spectra of compound **TPETHRB** with different species (a)  $\text{Fe}^{3+}$ , (b)  $\text{Al}^{3+}$ , (c)  $\text{Cr}^{3+}$  in  $\text{CH}_3\text{CN-PBS}$  (10 mM, pH = 7.4) mixture.

**Fig. S12**  $^1\text{H}$  NMR spectra (in  $\text{CDCl}_3$ ) of (a) **TPETHRB**, (b) **TPETHRB** with  $\text{H}^+$  ion and (c) compound **1**

**Fig. S13** Molecular orbitals of **TPETHRB** through DFT calculations with the B3LYP method.

**Fig. S14** The photographs of blank filter paper exposed to TFA vapor under natural light and the 365 nm UV lamp illumination.

**Fig. S15** Normalized Fluorescence spectra of **TPETHRB** in the absence and presence of  $\text{Fe}^{3+}$ ,  $\text{Al}^{3+}$  and  $\text{Cr}^{3+}$  ions.

**Table S1** The summarizing list of detection limits of materials for sensing  $\text{Fe}^{3+}$ ,  $\text{Al}^{3+}$  and  $\text{Cr}^{3+}$  ions.

**Table S2** CheckCIF report of XRD data of single crystal of **TPETHRB** (CCDC 1814395).

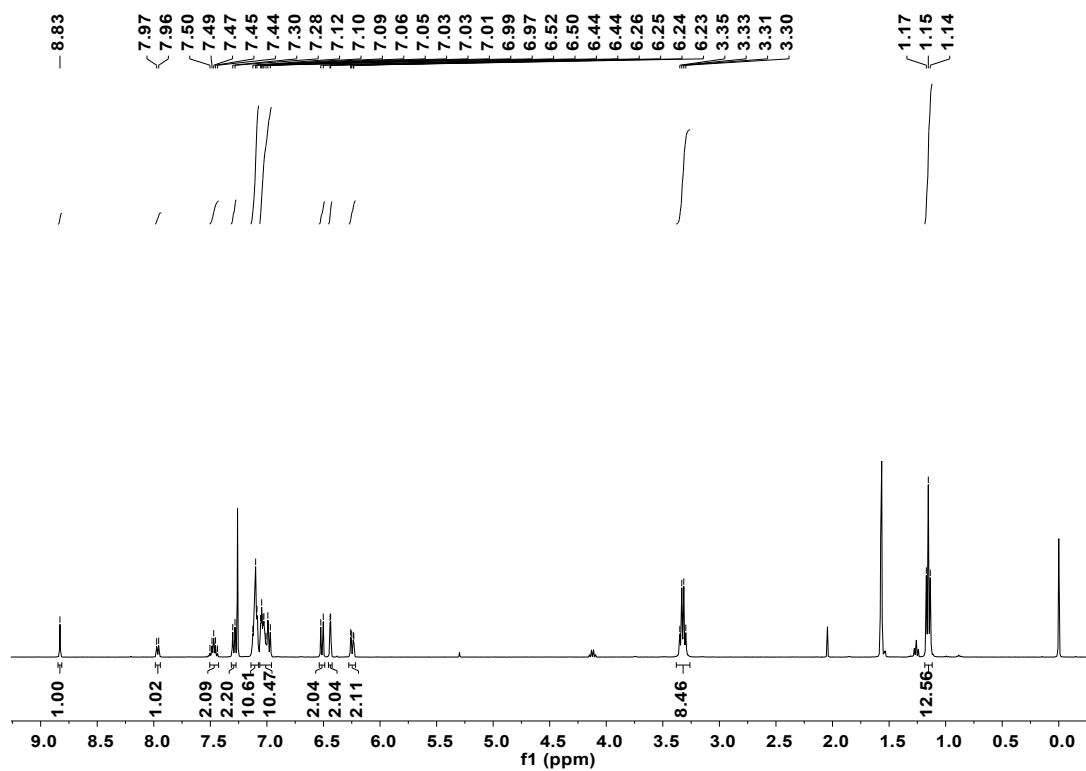

Fig. S1  $^1\text{H}$  NMR spectrum (in  $\text{CDCl}_3$ ) of TPETHRB.

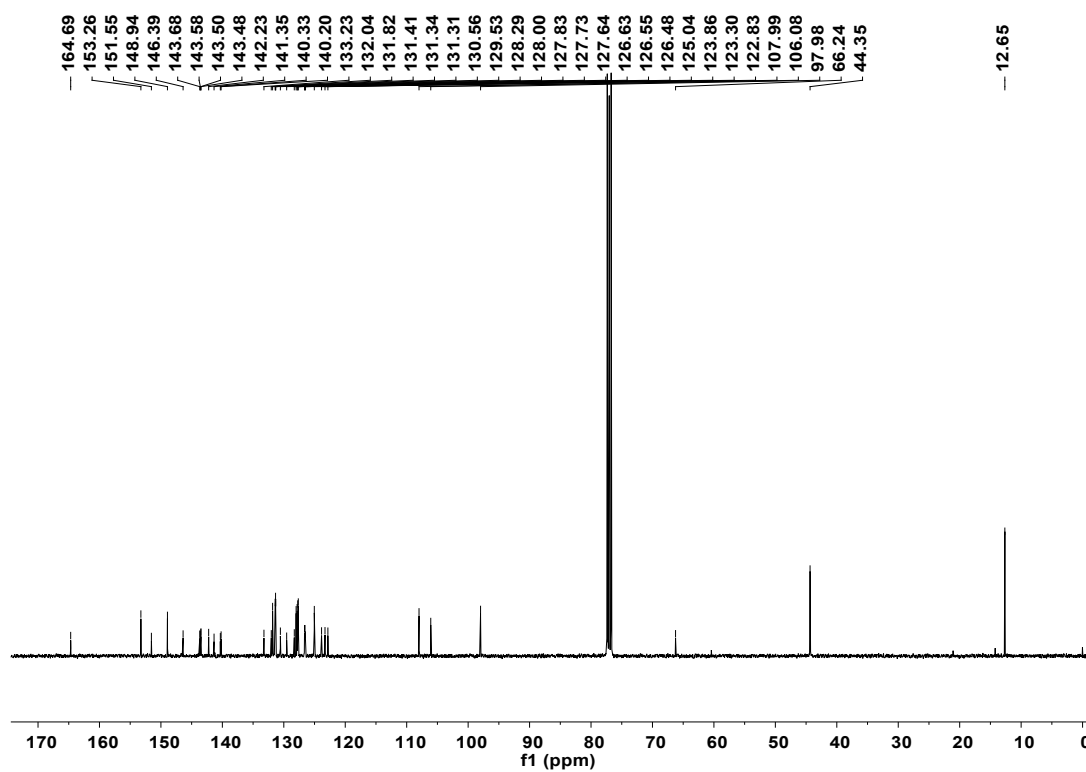

Fig. S2  $^{13}\text{C}$  NMR spectrum (in  $\text{CDCl}_3$ ) of TPETHRB.

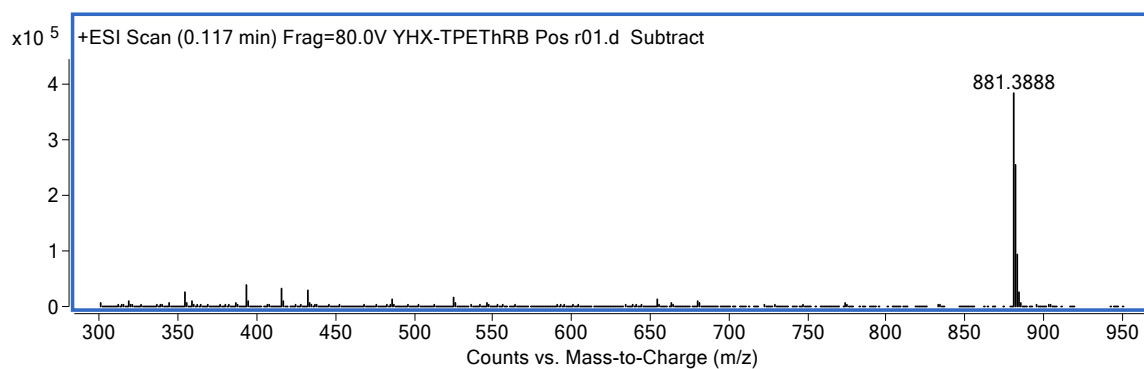

**Fig. S3** Mass spectrum (ESI) of TPETHRB.

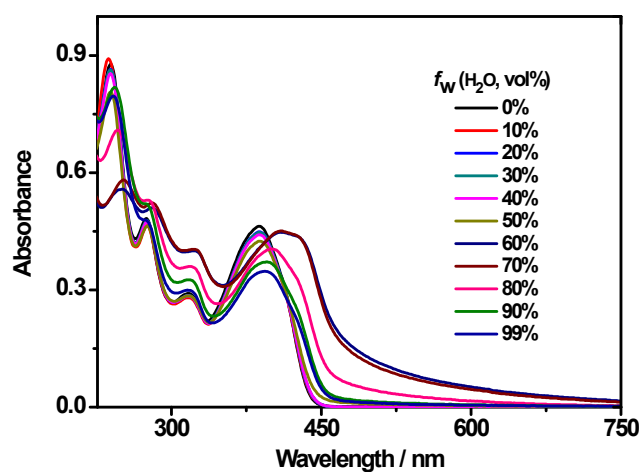

**Fig. S4** Absorption spectra of TPETHRB (10  $\mu$ M) in  $\text{CH}_3\text{CN-H}_2\text{O}$  mixtures ( $f_w = 0\text{-}99\%$ ).

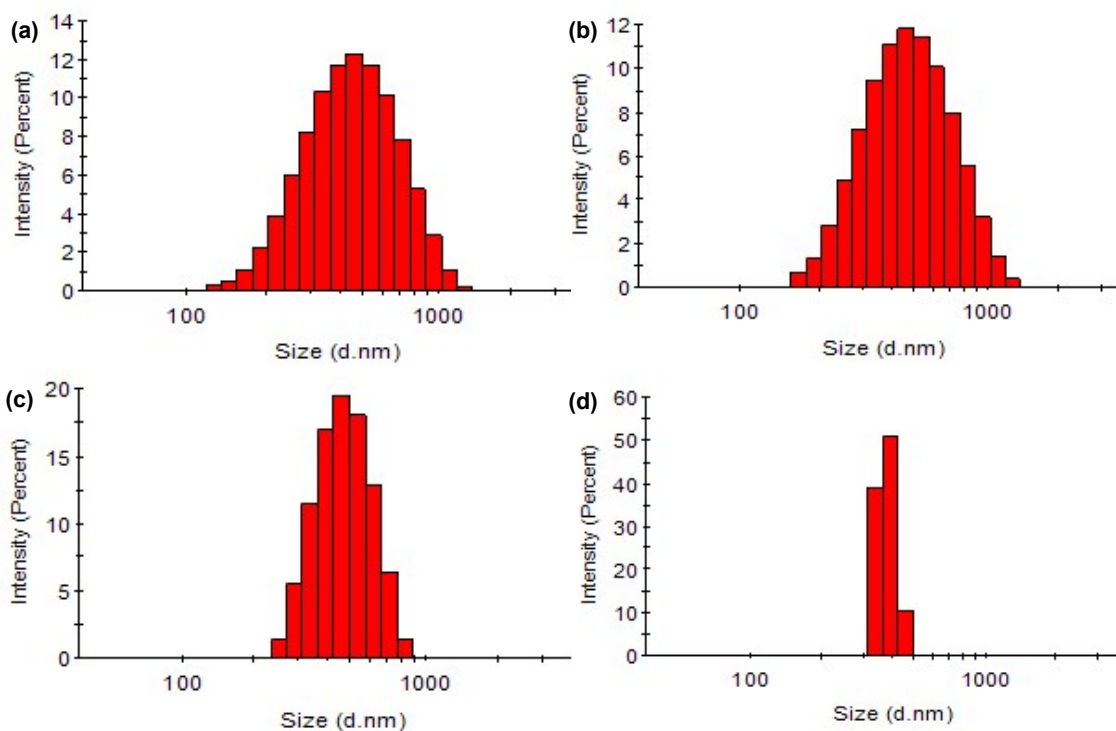

**Fig. S5** Particle size distributions of TPETHRB in  $\text{CH}_3\text{CN-H}_2\text{O}$  mixtures with different water contents, (a)  $f_w = 60\%$ , (b)  $f_w = 70\%$ , (c)  $f_w = 80\%$  and (d)  $f_w = 90\%$ .

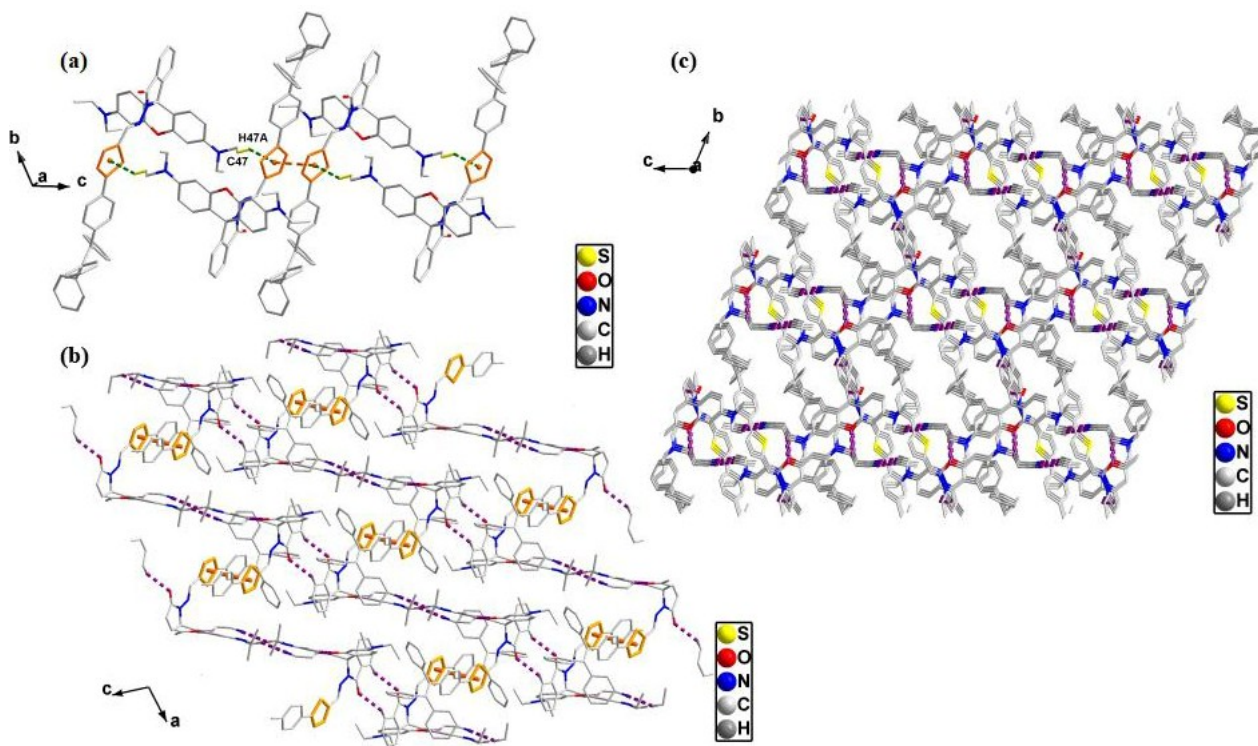

**Fig. S6** The 2D stacking modes of **TPETHRB** along (a) a axis, (b) b axis and (c) 3D stacking mode.

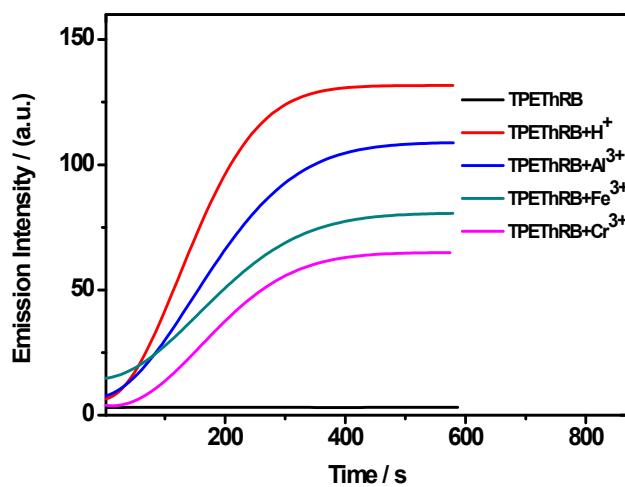

**Fig. S7** Response time of **TPETHRB** (10  $\mu\text{M}$ ) in  $\text{CH}_3\text{CN}-\text{H}_2\text{O}$  (v:v 3:2) mixtures with  $\text{Fe}^{3+}$  (50  $\mu\text{M}$ ),  $\text{Al}^{3+}$  (150  $\mu\text{M}$ ),  $\text{Cr}^{3+}$  (150  $\mu\text{M}$ ),  $\text{H}^+$  (150  $\mu\text{M}$ ).

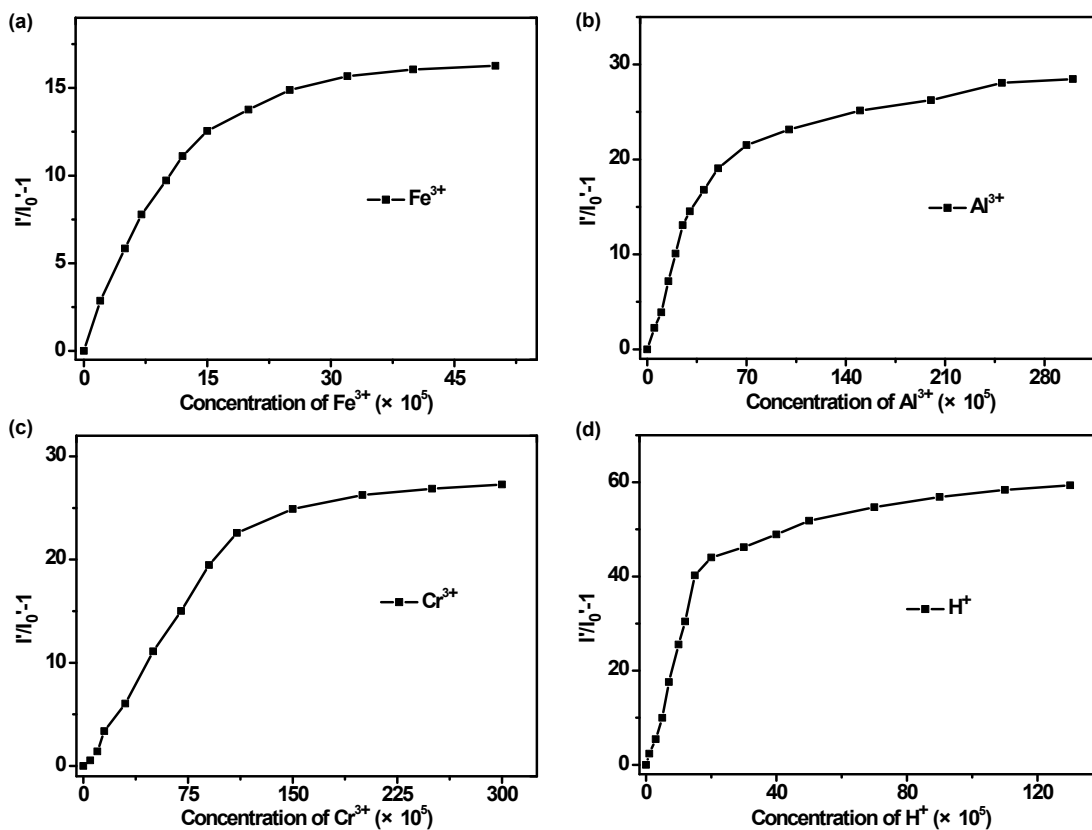

Fig. S8. Fluorescence titration plots of compound TPETHRB (10 μM) in CH<sub>3</sub>CN-H<sub>2</sub>O solution with different species (a)  $Fe^{3+}$ , (b)  $Al^{3+}$ , (c)  $Cr^{3+}$ , (d)  $H^+$ .

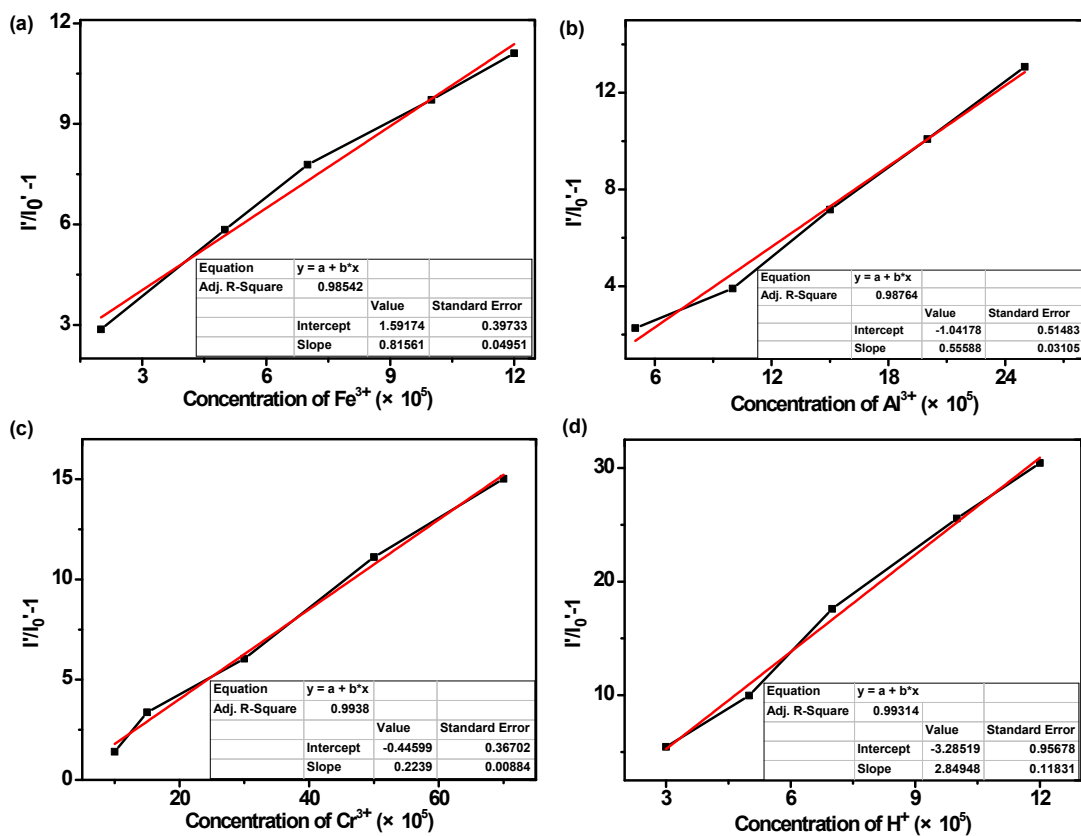

Fig. S9 The plots of  $[I'/I_0 - 1]$  versus the concentration of trivalent metal cations and  $H^+$ , (a)  $Fe^{3+}$ , (b)  $Al^{3+}$ , (c)  $Cr^{3+}$ , (d)  $H^+$ .

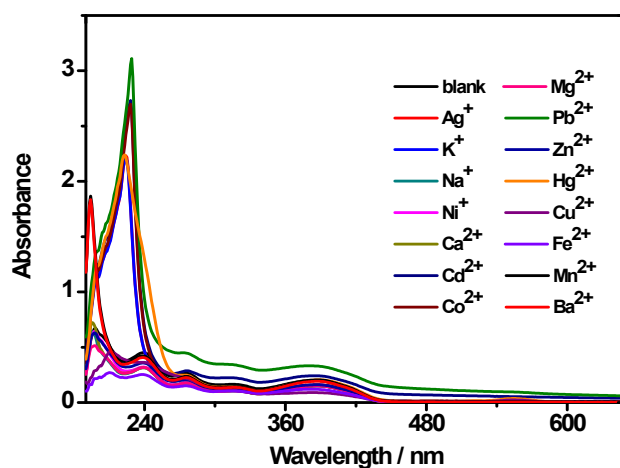

Fig. S10 UV-vis absorption spectra of TPETHRB with monovalent and divalent metal ions.

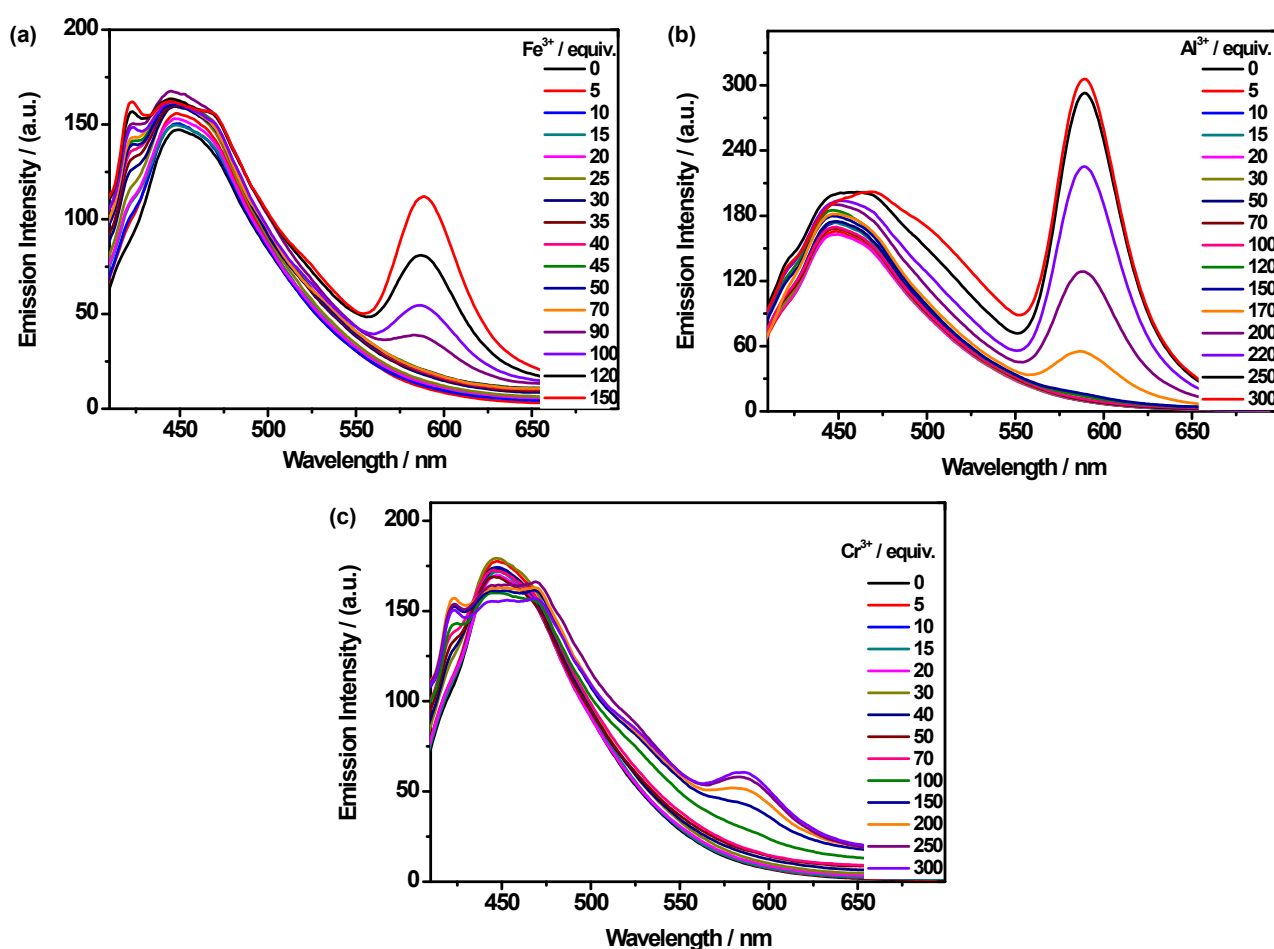

Fig. S11 Fluorescence spectra of compound TPETHRB with different species (a)  $\text{Fe}^{3+}$ , (b)  $\text{Al}^{3+}$ , (c)  $\text{Cr}^{3+}$  in  $\text{CH}_3\text{CN}$ -PBS (10 mM, pH = 7.4) mixture.

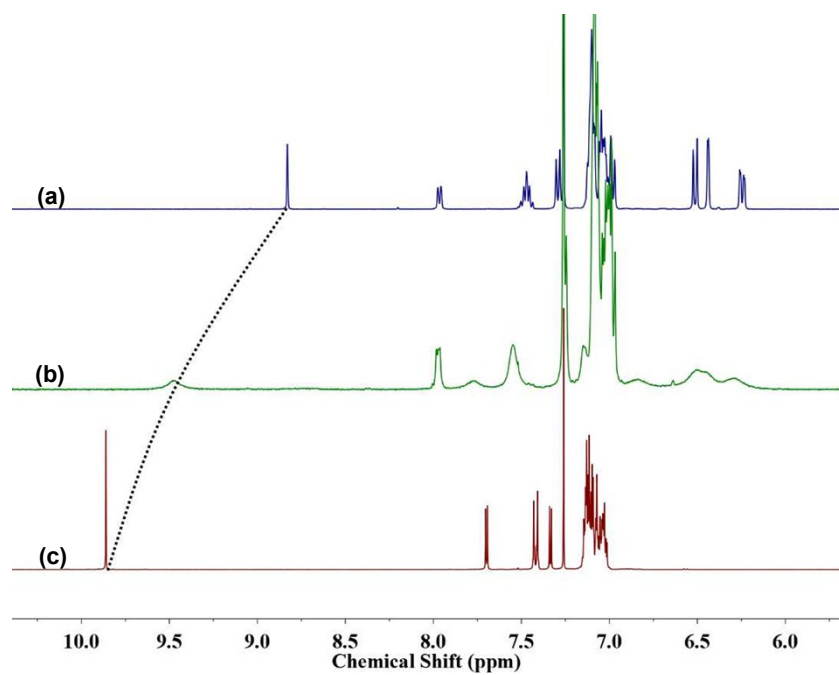

**Fig. S12**  $^1\text{H}$  NMR spectra (in  $\text{CDCl}_3$ ) of (a) **TPETHRB**, (b) **TPETHRB** with  $\text{H}^+$  ion and (c) compound **1**.

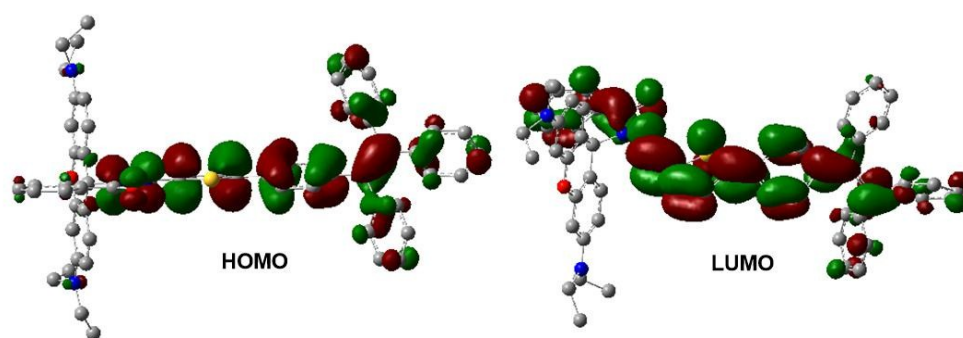

**Fig. S13** Molecular orbitals of **TPETHRB** through DFT calculations with the B3LYP method.

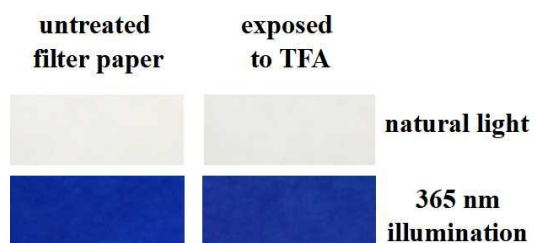

**Fig. S14** The photographs of blank filter paper exposed to TFA vapor under natural light and the 365 nm UV lamp illumination.



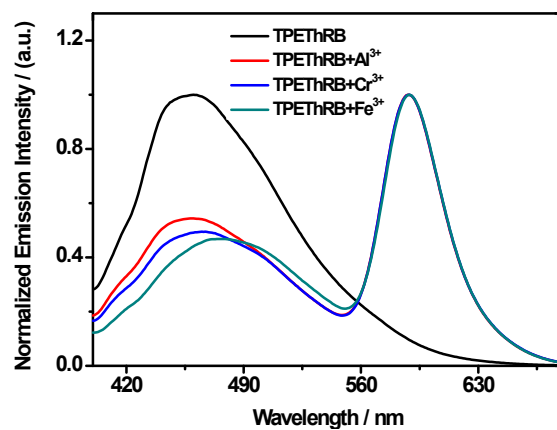

**Fig. S15** Normalized fluorescence spectra of **TPETHRB** in the absence and presence of  $\text{Fe}^{3+}$ ,  $\text{Al}^{3+}$  and  $\text{Cr}^{3+}$  ions.

**Table S1** The summarizing list of detection limits of materials for sensing  $\text{Fe}^{3+}$ ,  $\text{Al}^{3+}$  and  $\text{Cr}^{3+}$  ions.

| Material                                   | LOD of $\text{Fe}^{3+}$ ( $\mu\text{M}$ ) | Material                                          | LOD of $\text{Al}^{3+}$ ( $\mu\text{M}$ ) | Material                                                                                     | LOD of $\text{Cr}^{3+}$ ( $\mu\text{M}$ ) |
|--------------------------------------------|-------------------------------------------|---------------------------------------------------|-------------------------------------------|----------------------------------------------------------------------------------------------|-------------------------------------------|
| bis(rhodamine)                             | 50                                        | 6-thoxychomone-3-carbaldehyde-hydrazone           | 0.18                                      | Pyrene derivative PB                                                                         | 0.23                                      |
| Phenanthroimidazole derivative             | 5.26                                      | naphthalimide and naphthaldehyde-based derivative | 6.28                                      | rhodamine-2-amino-5-bromopyrimidine                                                          | 4.9                                       |
| salicylaldehydeazine                       | 9.5                                       | Eu-BTB anionic framework                          | 100                                       | $\{[\text{Zn}_2(\mu_3\text{-OH})(\text{cpta})(4,4'\text{-bipy})]\cdot\text{H}_2\text{O}\}_n$ | 5.55                                      |
| Zn-MOF-74 nanodot                          | 1.04                                      | naphthalene-quinoline derivative                  | 0.0367                                    | 2,7-disubstituted phenanthrene derivative                                                    | 400                                       |
| 2D terbium(III) coordination polymer Tb-CP | 0.05                                      | copolymer-ATP supramolecular complex CP-ATP       | 3.7                                       | Rhodamine capped gold nanoparticles                                                          | 9.28                                      |
| <b>TPETHRB</b>                             | 3.2                                       | <b>TPETHRB</b>                                    | 4.8                                       | <b>TPETHRB</b>                                                                               | 11.9                                      |

**Table S2** CheckCIF report of XRD data of single crystal of **TPEThRB** (CCDC 1814395).

---

|                        |                                                                  |                                                                 |                 |
|------------------------|------------------------------------------------------------------|-----------------------------------------------------------------|-----------------|
| Bond precision:        | C-C = 0.0049 Å                                                   | Wavelength=0.71073                                              |                 |
| Cell:                  | a=13.5619(9)                                                     | b=13.7951(10)                                                   | c=15.3779(11)   |
|                        | alpha=110.309(2)                                                 | beta=101.188(2)                                                 | gamma=97.849(2) |
| Temperature:           | 296 K                                                            |                                                                 |                 |
|                        | Calculated                                                       | Reported                                                        |                 |
| Volume                 | 2581.1(3)                                                        | 2581.1(3)                                                       |                 |
| Space group            | P -1                                                             | P -1                                                            |                 |
| Hall group             | -P 1                                                             | -P 1                                                            |                 |
| Moiety formula         | C <sub>59</sub> H <sub>52</sub> N <sub>4</sub> O <sub>2</sub> S, | C <sub>2</sub> H <sub>3</sub> N                                 |                 |
| Sum formula            | C <sub>61</sub> H <sub>55</sub> N <sub>5</sub> O <sub>2</sub> S  | C <sub>61</sub> H <sub>55</sub> N <sub>5</sub> O <sub>2</sub> S |                 |
| Mr                     | 922.16                                                           | 922.16                                                          |                 |
| Dx,g cm <sup>-3</sup>  | 1.186                                                            | 1.187                                                           |                 |
| Z                      | 2                                                                | 2                                                               |                 |
| Mu (mm <sup>-1</sup> ) | 0.111                                                            | 0.111                                                           |                 |
| F000                   | 976.0                                                            | 976.0                                                           |                 |
| F000'                  | 976.60                                                           |                                                                 |                 |
| h,k,lmax               | 16,16,18                                                         | 16,16,18                                                        |                 |
| Nref                   | 9147                                                             | 9139                                                            |                 |
| Tmin,Tmax              | 0.982,0.989                                                      | 0.980,0.989                                                     |                 |
| Tmin'                  | 0.980                                                            |                                                                 |                 |
| Data completeness=     | 0.999                                                            | Theta(max)= 25.048                                              |                 |
| R(reflections)=        | 0.0572(5281)                                                     | wR2(reflections)= 0.1466 ( 9139)                                |                 |
| S =                    | 1.019                                                            | Npar = 622                                                      |                 |

---
